# Supplementary material for: Ternary 3D reduced graphene oxide/Ni0.5Zn0.5Fe2O4/polyindole nanocomposite for supercapacitor electrode application
Source: Royal Society of Chemistry journal article supplement (doi:10.1039/d1ra04946a), 2021-01-01
Supplement: d1ra04946a1.pdf [file d1ra04946a1.pdf]

### 3D Reduced Graphene Oxide/Ni<sub>0.5</sub>Zn<sub>0.5</sub>Fe<sub>2</sub>O<sub>4</sub>/Polyindole nanocomposite modified glassy carbon electrode for supercapacitor applications

Anjitha Thadathil,<sup>a</sup> Yahya A. Ismail,<sup>a</sup> Pradeepan Periyat<sup>\*a,b</sup>

<sup>a</sup>Department of Chemistry, University of Calicut, Kerala, India-673635.

<sup>b</sup>Department of Environmental Studies, Kannur University, Kerala, India-670567.

E-mail:[pperiyat@uoc.ac.in](mailto:pperiyat@uoc.ac.in)/[pperiyat@kannuruniv.ac.in](mailto:pperiyat@kannuruniv.ac.in)

#### 1. Supporting information S1

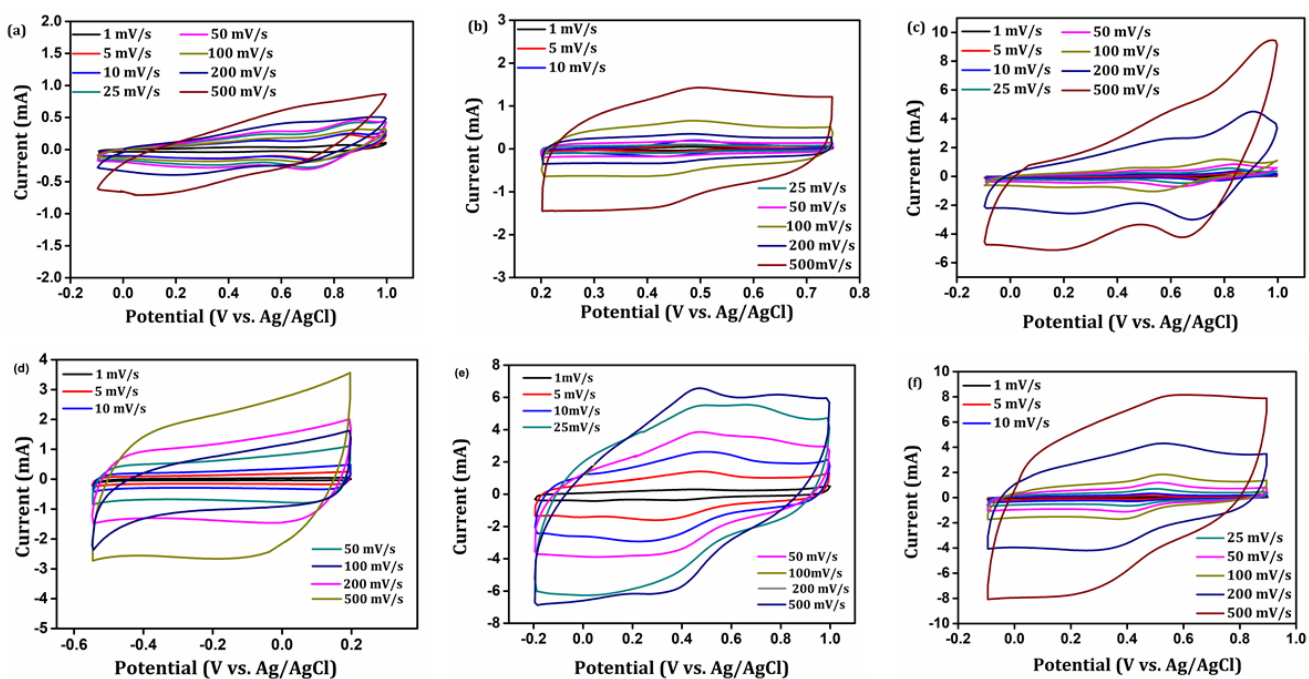

Fig.S1. The effect of scan rate on the stability of different electrodes within a scan ranges from 1 to 500 mV/s (a) PIN, (b) NZF, (c) PIN10, (d)3D RGO, (e) PIN/RGO, and (f) GN2.

## 2. Supporting information S2

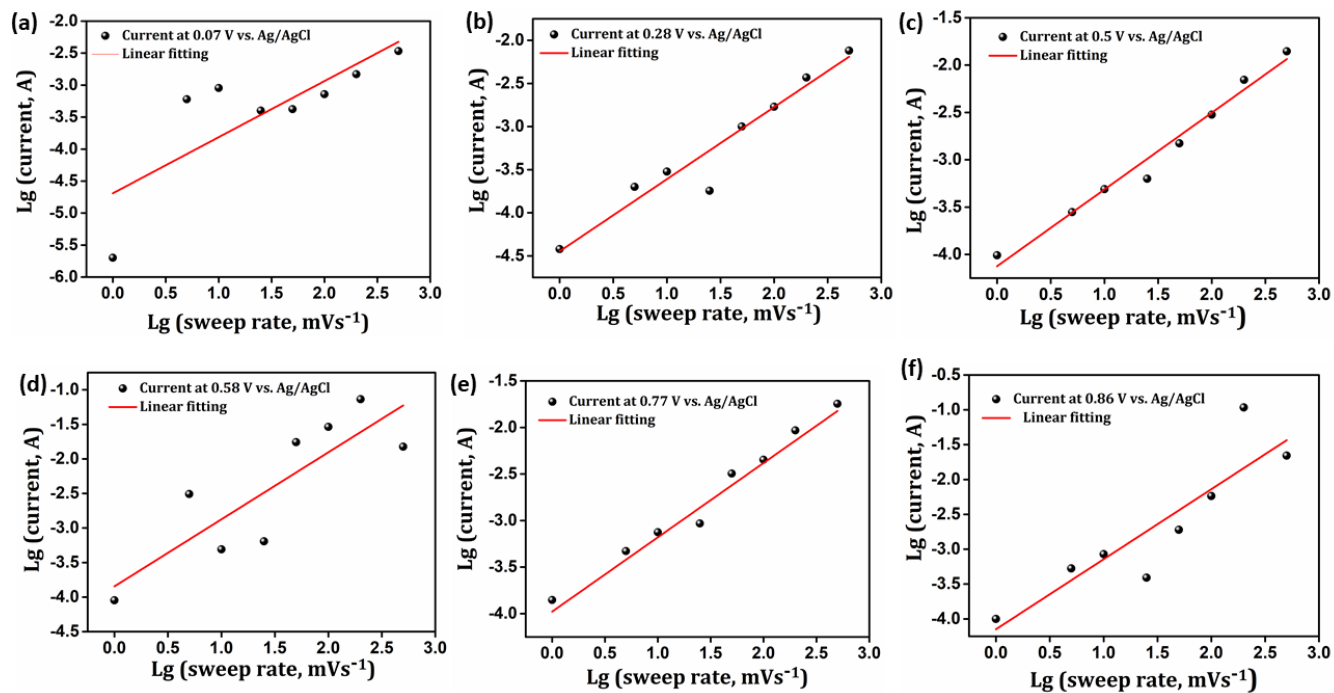

Fig. S2 The determination of b values at various potentials.

### 3. Supporting information S3

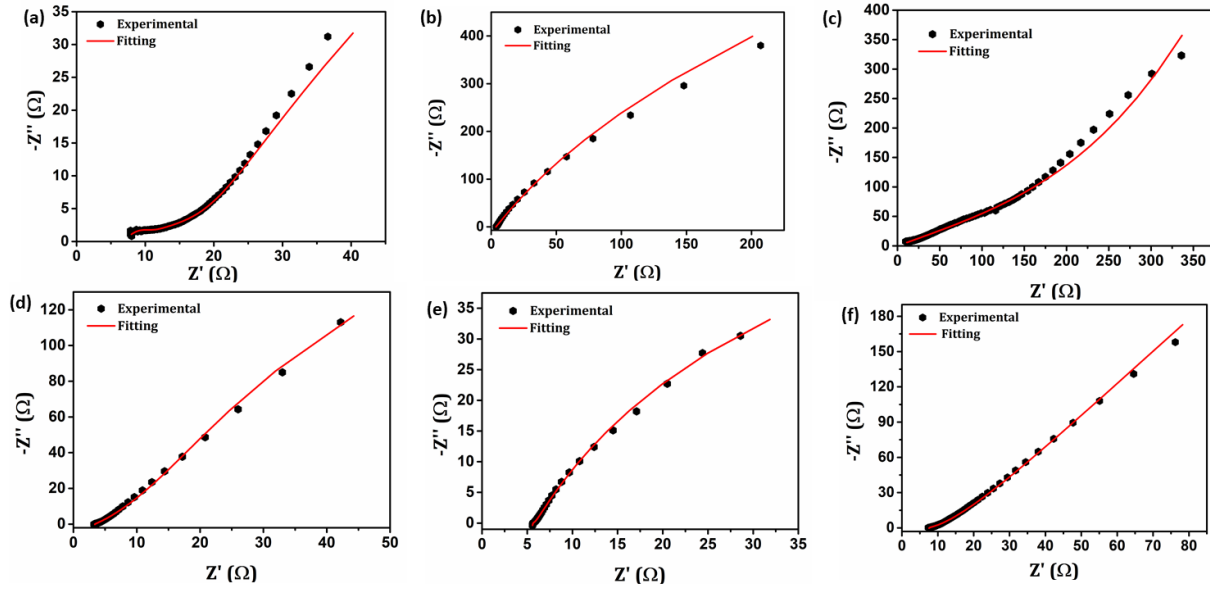

Fig. S3 Nyquist plots of (a) PIN, (b) NZF, (c) PN10, (d) 3D RGO, (e) PIN/RGO, and (f) GN2 after fitting with an equivalent circuit

### 4. Supporting information S4

**Table S1:** Specific surface area, cumulative pore volume, and average pore diameter of the electrode materials.

| Electrode material | Surface area (m <sup>2</sup> /g) | Pore volume (cm <sup>3</sup> /g) | Average pore diameter (nm) |
|--------------------|----------------------------------|----------------------------------|----------------------------|
| PIN                | 10                               | 0.010076                         | 2.6                        |
| NZF                | 14                               | 0.011943                         | 2.1                        |
| 3D RGO             | 240                              | 0.1795                           | 2.9                        |
| GN2                | 50                               | 0.035414                         | 3.2                        |
| GNP                | 61.9                             | 0.049722                         | 4.6                        |

### 5. Supporting information S5

**Table S2:** Fitted values of the components  $R_s$ ,  $R_1$ ,  $R_2$ , and  $W_d$  in equivalent circuit for different electrodes

| Electrode | $R_s$ ( $\Omega$ ) | $R_1$ ( $\Omega$ ) | $R_2$ ( $\Omega$ ) | $W_d$  |
|-----------|--------------------|--------------------|--------------------|--------|
| PIN       | 7.25               | 101                | 70.3               | 8.53 m |
| NZF       | 3.65               | 18.4 k             | 19.4 k             | 200    |
| PN10      | 9.8                | 34 k               | 13 k               | 219    |
| 3D RGO    | 3.34               | 296                | 138                | 638    |
| PIN/RGO   | 5.46               | 14                 | 134                | 200    |
| GN2       | 7.08               | 31                 | 0.6                | 213    |
| GNP       | 3.85               | 7.68               | 0.419              | 19     |
